# Supplementary material for: Increase of circulating IGFBP-4 following genotoxic stress and its implication for senescence
Source: eLife. 2020 Mar 30;9:e54523. doi: 10.7554/eLife.54523 (PMC7136022; doi:10.7554/eLife.54523)
Supplement: Figure 1—figure supplement 1—source data 2. [file elife-54523-fig1-figsupp1-data2.xlsx]

## Sheet: Figure 1 - figure supplement 1
Panel b
	Sample	Positive cells	Total cells		Rate	Mean	ST Dev	CV		% positive cells
1st Biological replicate	CTRL	61	507		0.120316
2nd Biological replicate	CTRL	52	523		0.0994264
3rd Biological replicate	CTRL	35	505		0.0693069	0.0963496	0.0256431	0.266147		9.63496
1st Biological replicate	Doxo	121	402		0.300995
2nd Biological replicate	Doxo	139	421		0.330166
3rd Biological replicate	Doxo	125	432		0.289352	0.306838	0.0210252	0.0685221		30.6838
1st Biological replicate	H2O2	160	456		0.350877
2nd Biological replicate	H2O2	175	472		0.370763
3rd Biological replicate	H2O2	184	481		0.382536	0.368059	0.0160019	0.0434764		36.8059
1st Biological replicate	IRL	75	501		0.149701
2nd Biological replicate	IRL	86	478		0.179916
3rd Biological replicate	IRL	66	507		0.130178	0.153265	0.0250602	0.163509		15.3265
1st Biological replicate	IRH	165	501		0.329341
2nd Biological replicate	IRH	182	478		0.380753
3rd Biological replicate	IRH	130	499		0.260521	0.323538	0.0603257	0.186456		32.3538
1st Biological replicate	Rep	202	412		0.490291
2nd Biological replicate	Rep	171	428		0.399533
3rd Biological replicate	Rep	157	437		0.359268	0.416364	0.0671138	0.16119		41.6364
Panel c
	Sample	WB IGFBP4	LC		Rate	Mean	ST Dev	CV
1st Biological replicate	CTRL	1139.7	3799		0.3
2nd Biological replicate	CTRL	1727	3454		0.5
3rd Biological replicate	CTRL	1328.4	3321		0.4	0.4	0.1	0.25
1st Biological replicate	Doxo	3420.9	3801		0.9
2nd Biological replicate	Doxo	3548	3548		1
3rd Biological replicate	Doxo	2480.1	3543		0.7	0.866667	0.152753	0.176253
1st Biological replicate	H2O2	6461.7	3801		1.7
2nd Biological replicate	H2O2	5623.5	3749		1.5
3rd Biological replicate	H2O2	4789.4	3421		1.4	1.53333	0.152753	0.0996212
1st Biological replicate	IRL	3923.2	4872		0.805255
2nd Biological replicate	IRL	4361.8	4374		0.997211
3rd Biological replicate	IRL	4194.1	4949		0.847464	0.88331	0.100874	0.1142
1st Biological replicate	IRH	4846.5	3231		1.5
2nd Biological replicate	IRH	5363.1	3743		1.43283
3rd Biological replicate	IRH	4182.1	3217		1.3	1.41094	0.101781	0.0721368
1st Biological replicate	Rep	3099	3099		1
2nd Biological replicate	Rep	4181.8	2987		1.4
3rd Biological replicate	Rep	3916.9	3013		1.3	1.23333	0.208167	0.168784
Panel d
	Sample	WB IGFBP4	LC		Rate	Mean	ST Dev	CV
1st Biological replicate	0h	903.3	3011		0.3
2nd Biological replicate	0h	1789.8	2983		0.6
3rd Biological replicate	0h	1229.6	3074		0.4	0.433333	0.152753	0.352506
1st Biological replicate	24h	2417.6	3022		0.8
2nd Biological replicate	24h	3041	3041		1
3rd Biological replicate	24h	2493.5	2987		0.834784	0.878261	0.106854	0.121665
1st Biological replicate	48h	6658	3079		2.16239
2nd Biological replicate	48h	7099	3045		2.33136
3rd Biological replicate	48h	6301.7	3001		2.09987	2.19787	0.119758	0.054488
1st Biological replicate	96h	6562.6	2983		2.2
2nd Biological replicate	96h	5135.7	3021		1.7
3rd Biological replicate	96h	5905.1	3003		1.9664	1.95547	0.250179	0.127938
Panel e
	Sample	O.D.		Mean	ST. DEV	CV
1st Biological replicate	0	0.01
2nd Biological replicate	0	0.02
3rd Biological replicate	0	0.01		0.0133333	0.0057735	0.433013
1st Biological replicate	10	0.5
2nd Biological replicate	10	0.3
3rd Biological replicate	10	0.5		0.433333	0.11547	0.266469
1st Biological replicate	20	1
2nd Biological replicate	20	1.1
3rd Biological replicate	20	0.9		1	0.1	0.1
1st Biological replicate	30	1.75
2nd Biological replicate	30	1.7
3rd Biological replicate	30	1.6		1.68333	0.0763763	0.045372
1st Biological replicate	40	1.5
2nd Biological replicate	40	1.6
3rd Biological replicate	40	1.5		1.53333	0.057735	0.0376533
1st Biological replicate	50	1.2
2nd Biological replicate	50	1.3
3rd Biological replicate	50	1.2		1.23333	0.057735	0.0468122
1st Biological replicate	60	1
2nd Biological replicate	60	1
3rd Biological replicate	60	1.2		1.06667	0.11547	0.108253
1st Biological replicate	90	1
2nd Biological replicate	90	0.9
3rd Biological replicate	90	1		0.966667	0.057735	0.0597259
1st Biological replicate	180	0.75
2nd Biological replicate	180	0.8
3rd Biological replicate	180	0.7		0.75	0.05	0.0666667
1st Biological replicate	360	0.5
2nd Biological replicate	360	0.6
3rd Biological replicate	360	0.55		0.55	0.05	0.0909091
