# Supplementary material for: Increase of circulating IGFBP-4 following genotoxic stress and its implication for senescence
Source: eLife. 2020 Mar 30;9:e54523. doi: 10.7554/eLife.54523 (PMC7136022; doi:10.7554/eLife.54523)
Supplement: Figure 1—source data 2. [file elife-54523-fig1-data2.xlsx]

## Sheet: Figure 1
Panel a
	Sample	WB IGFBP4	LC		Rate	Mean	ST Dev	CV
1st Biological replicate	0h	1623.5	3247		0.5
2nd Biological replicate	0h	1750.7	2501		0.7
3rd Biological replicate	0h	1372.8	3432		0.4	0.533333	0.152753	0.286411
1st Biological replicate	6h	2314.4	2893		0.8
2nd Biological replicate	6h	3461.7	3147		1.1
3rd Biological replicate	6h	3363.96	3298		1.02	0.973333	0.155349	0.159605
1st Biological replicate	24h	6113.8	2779		2.2
2nd Biological replicate	24h	6132.51	3051		2.01
3rd Biological replicate	24h	5373	2985		1.8	2.00333	0.200083	0.0998752
1st Biological replicate	48h	5599.8	2745		2.04
2nd Biological replicate	48h	5596.8	3498		1.6
3rd Biological replicate	48h	5120.4	3012		1.7	1.78	0.230651	0.129579
1st Biological replicate	72h	5633.78	2789		2.02
2nd Biological replicate	72h	5698.1	2999		1.9
3rd Biological replicate	72h	6325.2	3012		2.1	2.00667	0.100664	0.050165
1st Biological replicate	144h	7306.2	3321		2.2
2nd Biological replicate	144h	8552.5	3421		2.5
3rd Biological replicate	144h	6411.9	3190		2.01	2.23667	0.247049	0.110454
Panel b
	Sample	Positive cells	Total cells		Rate	Mean	ST Dev	CV		% positive cells
1st Biological replicate	0h Lung	40	401		0.0997506
2nd Biological replicate	0h Lung	59	574		0.102787
3rd Biological replicate	0h Lung	60	532		0.112782	0.105107	0.00681821	0.0648694		10.5107
1st Biological replicate	144h Lung	144	547		0.263254
2nd Biological replicate	144h Lung	134	498		0.269076
3rd Biological replicate	144h Lung	147	505		0.291089	0.274473	0.0146813	0.0534891		27.4473
1st Biological replicate	0h Heart	57	572		0.0996503
2nd Biological replicate	0h Heart	34	479		0.0709812
3rd Biological replicate	0h Heart	44	554		0.0794224	0.0833513	0.0147329	0.176756		8.33513
1st Biological replicate	144h Heart	100	667		0.149925
2nd Biological replicate	144h Heart	120	598		0.200669
3rd Biological replicate	144h Heart	128	555		0.230631	0.193742	0.0407963	0.210571		19.3742
1st Biological replicate	0h Kidney	69	345		0.2
2nd Biological replicate	0h Kidney	97	442		0.219457
3rd Biological replicate	0h Kidney	72	398		0.180905	0.200121	0.0192765	0.0963246		20.0121
1st Biological replicate	144h Kidney	210	382		0.549738
2nd Biological replicate	144h Kidney	253	421		0.60095
3rd Biological replicate	144h Kidney	227	399		0.568922	0.573204	0.025873	0.0451375		57.3204
Panel c
	Sample	Positive cells	Total cells		Rate	Mean	ST Dev	CV		% positive cells
1st Biological replicate	0h MSC	29	571		0.0507881
2nd Biological replicate	0h MSC	30	434		0.0691244
3rd Biological replicate	0h MSC	60	599		0.100167	0.0733598	0.0249604	0.340246		7.33598
1st Biological replicate	144h MSC	86	478		0.179916
2nd Biological replicate	144h MSC	95	433		0.2194
3rd Biological replicate	144h MSC	71	476		0.14916	0.182825	0.0352102	0.192589		18.2825
Panel d
	Sample	O.D.		Mean	ST. DEV	CV
1st Biological replicate	0h 1d	0.312
2nd Biological replicate	0h 1d	0.321
3rd Biological replicate	0h 1d	0.333		0.322	0.0105357	0.0327194
1st Biological replicate	144h 1d	0.334
2nd Biological replicate	144h 1d	0.351
3rd Biological replicate	144h 1d	0.251		0.312	0.053507	0.171497
1st Biological replicate	0h 2d	0.514
2nd Biological replicate	0h 2d	0.514
3rd Biological replicate	0h 2d	0.452		0.493333	0.0357957	0.0725589
1st Biological replicate	144h 2d	0.451
2nd Biological replicate	144h 2d	0.5
3rd Biological replicate	144h 2d	0.381		0.444	0.059808	0.134703
1st Biological replicate	0h 3d	0.784
2nd Biological replicate	0h 3d	0.821
3rd Biological replicate	0h 3d	0.895		0.833333	0.0565184	0.0678221
1st Biological replicate	144h 3d	0.501
2nd Biological replicate	144h 3d	0.621
3rd Biological replicate	144h 3d	0.6		0.574	0.0640859	0.111648
1st Biological replicate	0h 4d	1.105
2nd Biological replicate	0h 4d	0.9
3rd Biological replicate	0h 4d	1.23		1.07833	0.166608	0.154505
1st Biological replicate	144h 4d	0.741
2nd Biological replicate	144h 4d	0.674
3rd Biological replicate	144h 4d	0.7		0.705	0.0337787	0.047913
Panel e
	Sample	WB	LC		Rate	Mean	ST. DEV	CV
1st Biological replicate	RB 0h	4593.6	1914		2.4
2nd Biological replicate	RB 0h	7075.2	2112		3.35
3rd Biological replicate	RB 0h	9245.11	2023		4.57	3.44	1.0878	0.31622
1st Biological replicate	RB 144h	13126.6	2001		6.56
2nd Biological replicate	RB 144h	15716.9	1992		7.89
3rd Biological replicate	RB 144h	15049.7	2031		7.41	7.28667	0.673523	0.0924323
1st Biological replicate	P53 0h	15415.4	2002		7.7
2nd Biological replicate	P53 0h	13100.6	1994		6.57
3rd Biological replicate	P53 0h	17803.4	2037		8.74	7.67	1.08531	0.141501
1st Biological replicate	P53 144h	37874.2	2081		18.2
2nd Biological replicate	P53 144h	31306.9	1989		15.74
3rd Biological replicate	P53 144h	27837.1	2007		13.87	15.9367	2.17169	0.13627
1st Biological replicate	P27 0h	3979.8	2001		1.98891
2nd Biological replicate	P27 0h	4833.62	1903		2.54
3rd Biological replicate	P27 0h	2808.72	1992		1.41	1.97964	0.565057	0.285435
1st Biological replicate	P27 144h	15223.3	2011		7.57
2nd Biological replicate	P27 144h	18863.9	2103		8.97
3rd Biological replicate	P27 144h	12499.6	1874		6.67	7.73667	1.15902	0.149809
1st Biological replicate	P21 0h	9129.12	2002		4.56
2nd Biological replicate	P21 0h	11704.8	1994		5.87
3rd Biological replicate	P21 0h	7292.46	2037		3.58	4.67	1.14896	0.246029
1st Biological replicate	P21 144h	15669.9	2081		7.53
2nd Biological replicate	P21 144h	11416.9	1989		5.74
3rd Biological replicate	P21 144h	19809.1	2007		9.87	7.71333	2.07109	0.268508
1st Biological replicate	P16 0h	7598.58	1914		3.97
2nd Biological replicate	P16 0h	6293.76	2112		2.98
3rd Biological replicate	P16 0h	7424.41	2023		3.67	3.54	0.507642	0.143402
1st Biological replicate	P16 144h	16488.2	2001		8.24
2nd Biological replicate	P16 144h	19661	1992		9.87
3rd Biological replicate	P16 144h	15415.3	2031		7.59	8.56667	1.17458	0.13711
Panel f
	Sample	n° of clones		Mean	ST. DEV	CV
1st Biological replicate	CTRL	310
2nd Biological replicate	CTRL	337
3rd Biological replicate	CTRL	260		302.333	39.0683	0.129223
1st Biological replicate	IGFBP-4	219
2nd Biological replicate	IGFBP-4	229
3rd Biological replicate	IGFBP-4	174		207.333	29.2973	0.141305
Panel g
	Sample	Positive cells	Total		Rate	Mean	ST. DEV	CV		% of positive cells
1st Biological replicate	CTRL Lung	29	577		0.05026
2nd Biological replicate	CTRL Lung	55	545		0.100917
3rd Biological replicate	CTRL Lung	15	499		0.0300601	0.0604125	0.0365034	0.604235		6.04125
1st Biological replicate	IGFBP-4 Lung	149	498		0.299197
2nd Biological replicate	IGFBP-4 Lung	170	513		0.331384
3rd Biological replicate	IGFBP-4 Lung	121	502		0.241036	0.290539	0.0457921	0.157611		29.0539
1st Biological replicate	CTRL Heart	65	531		0.122411
2nd Biological replicate	CTRL Heart	41	505		0.0811881
3rd Biological replicate	CTRL Heart	28	478		0.0585774	0.087392	0.0323656	0.37035		8.7392
1st Biological replicate	IGFBP-4 Heart	129	479		0.269311
2nd Biological replicate	IGFBP-4 Heart	125	578		0.216263
3rd Biological replicate	IGFBP-4 Heart	111	555		0.2	0.228525	0.0362459	0.158608		22.8525
1st Biological replicate	CTRL Kidney	147	349		0.421203
2nd Biological replicate	CTRL Kidney	189	378		0.5
3rd Biological replicate	CTRL Kidney	133	333		0.399399	0.440201	0.0529226	0.120224		44.0201
1st Biological replicate	IGFBP-4 Kidney	289	401		0.720698
2nd Biological replicate	IGFBP-4 Kidney	354	398		0.889447
3rd Biological replicate	IGFBP-4 Kidney	258	303		0.851485	0.820544	0.0885274	0.107889		82.0544
Panel h
	Sample	Positive cells	Total		Rate	Mean	ST. DEV	CV		% of positive cells
1st Biological replicate	CTRL	40	399		0.100251
2nd Biological replicate	CTRL	41	457		0.0897155
3rd Biological replicate	CTRL	31	521		0.059501	0.0831557	0.021152	0.254366		8.31557
1st Biological replicate	IGFBP-4	98	432		0.226852
2nd Biological replicate	IGFBP-4	79	444		0.177928
3rd Biological replicate	IGFBP-4	96	503		0.190855	0.198545	0.0253523	0.127691		19.8545
Panel i
	Sample	O.D.		Mean	ST. DEV	CV
1st Biological replicate	CTRL 1d	0.354
2nd Biological replicate	CTRL 1d	0.287
3rd Biological replicate	CTRL 1d	0.301		0.314	0.0353412	0.112552
1st Biological replicate	IGFBP-4 1d	0.224
2nd Biological replicate	IGFBP-4 1d	0.271
3rd Biological replicate	IGFBP-4 1d	0.251		0.248667	0.0235867	0.0948528
1st Biological replicate	CTRL 2d	0.478
2nd Biological replicate	CTRL 2d	0.555
3rd Biological replicate	CTRL 2d	0.523		0.518667	0.0386825	0.0745806
1st Biological replicate	IGFBP-4 2d	0.351
2nd Biological replicate	IGFBP-4 2d	0.452
3rd Biological replicate	IGFBP-4 2d	0.312		0.371667	0.0722519	0.1944
1st Biological replicate	CTRL 3d	0.874
2nd Biological replicate	CTRL 3d	0.984
3rd Biological replicate	CTRL 3d	0.824		0.894	0.0818535	0.0915588
1st Biological replicate	IGFBP-4 3d	0.574
2nd Biological replicate	IGFBP-4 3d	0.541
3rd Biological replicate	IGFBP-4 3d	0.56		0.558333	0.016563	0.0296651
1st Biological replicate	CTRL 4d	1.254
2nd Biological replicate	CTRL 4d	1.31
3rd Biological replicate	CTRL 4d	1.267		1.277	0.0293087	0.0229512
1st Biological replicate	IGFBP-4 4d	0.845
2nd Biological replicate	IGFBP-4 4d	0.745
3rd Biological replicate	IGFBP-4 1d	0.987		0.859	0.121606	0.141567
Panel j
	Sample	WB	LC		Rate	Mean	ST. DEV	CV
1st Biological replicate	RB CTRL	9612.6	1732		5.55
2nd Biological replicate	RB CTRL	11277.3	1889		5.97
3rd Biological replicate	RB CTRL	9149.14	2002		4.57	5.36333	0.718424	0.133951
1st Biological replicate	RB IGFBP-4	22026.2	1801		12.23
2nd Biological replicate	RB IGFBP-4	31306.9	1989		15.74
3rd Biological replicate	RB IGFBP-4	20634.4	2021		10.21	12.7267	2.79826	0.219873
1st Biological replicate	P53 CTRL	13992.2	2022		6.92
2nd Biological replicate	P53 CTRL	13133.4	1999		6.57
3rd Biological replicate	P53 CTRL	10354.2	1976		5.24	6.24333	0.88636	0.141969
1st Biological replicate	P53 IGFBP-4	41640.3	2222		18.74
2nd Biological replicate	P53 IGFBP-4	31055	1973		15.74
3rd Biological replicate	P53 IGFBP-4	32341.7	1932		16.74	17.0733	1.52753	0.0894685
1st Biological replicate	P27 CTRL	5245.68	1987		2.64
2nd Biological replicate	P27 CTRL	4968.24	1956		2.54
3rd Biological replicate	P27 CTRL	5961.42	1942		3.06973	2.74991	0.28145	0.102349
1st Biological replicate	P27 IGFBP-4	8563.72	2083		4.11124
2nd Biological replicate	P27 IGFBP-4	8718.57	2277		3.82897
3rd Biological replicate	P27 IGFBP-4	9765.28	2132		4.58034	4.17352	0.379534	0.0909386	rispetto a quello dopo
1st Biological replicate	P21 CTRL	8906.02	2022		4.40456
2nd Biological replicate	P21 CTRL	8736.13	1999		4.37025
3rd Biological replicate	P21 CTRL	8074.08	1976		4.08607	4.28696	0.174818	0.040779
1st Biological replicate	P21 IGFBP-4	17287.2	2222		7.78
2nd Biological replicate	P21 IGFBP-4	15271	1973		7.74
3rd Biological replicate	P21 IGFBP-4	16248.1	1932		8.41	7.97667	0.37581	0.0471137
1st Biological replicate	P16 CTRL	4451.24	1732		2.57
2nd Biological replicate	P16 CTRL	6932.63	1889		3.67
3rd Biological replicate	P16 CTRL	5965.96	2002		2.98	3.07333	0.555908	0.180881
1st Biological replicate	P16 IGFBP-4	11904.6	1801		6.61
2nd Biological replicate	P16 IGFBP-4	15474.4	1989		7.78
3rd Biological replicate	P16 IGFBP-4	14187.4	2021		7.02	7.13667	0.593661	0.0831846
