# Supplementary material for: Increase of circulating IGFBP-4 following genotoxic stress and its implication for senescence
Source: eLife. 2020 Mar 30;9:e54523. doi: 10.7554/eLife.54523 (PMC7136022; doi:10.7554/eLife.54523)
Supplement: Figure 2—source data 2. [file elife-54523-fig2-data2.xlsx]

## Sheet: Figure 2
Panel a
	Sample	WB	LC		Rate	Mean	ST. DEV	CV
1st Biological replicate	1B	5402	3001		1.80007
2nd Biological replicate	1B	6632	4421		1.50011
3rd Biological replicate	1B	7568	3983		1.90008	1.73342	0.208144	0.120077
1st Biological replicate	1A	9603	3201		3
2nd Biological replicate	1A	13197	3999		3.30008
3rd Biological replicate	1A	10847	3874		2.79995	3.03334	0.251725	0.082986
1st Biological replicate	2B	9055	3773		2.39995
2nd Biological replicate	2B	8802	4001		2.19995
3rd Biological replicate	2B	7284	3642		2	2.19997	0.199973	0.0908985
1st Biological replicate	2A	10310	3555		2.90014
2nd Biological replicate	2A	9973	3989		2.50013
3rd Biological replicate	2A	9963	3321		3	2.80009	0.264531	0.0944722
1st Biological replicate	3B	11298	3896		2.8999
2nd Biological replicate	3B	8868	3547		2.50014
3rd Biological replicate	3B	9597	3199		3	2.80001	0.264476	0.0944552
1st Biological replicate	3A	14937	4037		3.70002
2nd Biological replicate	3A	15536	3884		4
3rd Biological replicate	3A	12863	3675		3.50014	3.73339	0.251596	0.0673909
1st Biological replicate	4B	9970	3988		2.5
2nd Biological replicate	4B	10329	3443		3
3rd Biological replicate	4B	9366	3345		2.8	2.76667	0.251661	0.0909619
1st Biological replicate	4A	13224	3574		3.70006
2nd Biological replicate	4A	13350	3423		3.90009
3rd Biological replicate	4A	11959	3322		3.59994	3.73336	0.152821	0.0409338
1st Biological replicate	5B	11301	4036		2.80005
2nd Biological replicate	5B	11502	3834		3
3rd Biological replicate	5B	9914	3198		3.10006	2.9667	0.152753	0.0514891
1st Biological replicate	5A	13997	3888		3.60005
2nd Biological replicate	5A	15206	3899		3.89997
3rd Biological replicate	5A	13328	3332		4	3.83334	0.208134	0.0542956
1st Biological replicate	6B	8320	3782		2.19989
2nd Biological replicate	6B	7290	3645		2
3rd Biological replicate	6B	6785	3231		2.09997	2.09995	0.0999471	0.0475949
1st Biological replicate	6A	9990	3700		2.7
2nd Biological replicate	6A	10971	3657		3
3rd Biological replicate	6A	9220	3293		2.79988	2.83329	0.152766	0.0539181
1st Biological replicate	7B	7186	3782		1.90005
2nd Biological replicate	7B	4240	3533		1.20011
3rd Biological replicate	7B	5986	2993		2	1.70006	0.435837	0.256366
1st Biological replicate	7A	8141	3392		2.40006
2nd Biological replicate	7A	7505	3002		2.5
3rd Biological replicate	7A	7528	2788		2.70014	2.5334	0.152805	0.0603162
1st Biological replicate	8B	4853	3033		1.60007
2nd Biological replicate	8B	3937	3281		1.19994
3rd Biological replicate	8B	5102	3001		1.7001	1.50003	0.26466	0.176436
1st Biological replicate	8A	7195	2998		2.39993
2nd Biological replicate	8A	8490	3032		2.80013
3rd Biological replicate	8A	6158	2799		2.20007	2.46671	0.305553	0.123871
1st Biological replicate	9B	5992	3745		1.6
2nd Biological replicate	9B	5313	3542		1.5
3rd Biological replicate	9B	4754	2971		1.60013	1.56671	0.0577739	0.0368759
1st Biological replicate	9A	9324	3330		2.8
2nd Biological replicate	9A	9657	3219		3
3rd Biological replicate	9A	7370	2948		2.5	2.76667	0.251661	0.0909619
1st Biological replicate	10B	5252	3501		1.50014
2nd Biological replicate	10B	4187	3221		1.29991
3rd Biological replicate	10B	3292	2993		1.0999	1.29998	0.200122	0.153942
1st Biological replicate	10A	6600	3300		2
2nd Biological replicate	10A	5744	3023		1.9001
3rd Biological replicate	10A	6701	2792		2.40007	2.10006	0.264578	0.125986
