# Supplementary material for: Increase of circulating IGFBP-4 following genotoxic stress and its implication for senescence
Source: eLife. 2020 Mar 30;9:e54523. doi: 10.7554/eLife.54523 (PMC7136022; doi:10.7554/eLife.54523)
Supplement: Figure 3—source data 2. [file elife-54523-fig3-data2.xlsx]

## Sheet: Figure 3
Panel b
	Sample	Positive cells	Total cells		Rate	Mean	ST Dev	CV		% positive cells
1st Biological replicate	CTRL	50	498		0.100402
2nd Biological replicate	CTRL	64	532		0.120301
3rd Biological replicate	CTRL	53	538		0.098513	0.106405	0.012071	0.113443		10.6405
1st Biological replicate	H2O2	156	472		0.330508
2nd Biological replicate	H2O2	172	491		0.350305
3rd Biological replicate	H2O2	146	488		0.29918	0.326665	0.0257784	0.078914		32.6665
1st Biological replicate	PGE2	60	498		0.120482
2nd Biological replicate	PGE2	50	503		0.0994036
3rd Biological replicate	PGE2	51	511		0.0998043	0.106563	0.0120556	0.113131		10.6563
1st Biological replicate	CTRL + PXB	57	479		0.118998
2nd Biological replicate	CTRL + PXB	53	532		0.0996241
3rd Biological replicate	CTRL + PXB	56	507		0.110454	0.109692	0.00970936	0.0885149		10.9692
1st Biological replicate	H2O2 +PXB	153	478		0.320084
2nd Biological replicate	H2O2 +PXB	161	537		0.299814
3rd Biological replicate	H2O2 +PXB	193	479		0.402923	0.34094	0.054627	0.160225		34.094
1st Biological replicate	PGE2 +PXB	63	529		0.119093
2nd Biological replicate	PGE2 +PXB	71	517		0.137331
3rd Biological replicate	PGE2 +PXB	65	471		0.138004	0.131476	0.0107295	0.0816081		13.1476
Panel c
	Sample	WB	LC		Rate	Mean	ST. DEV	CV
1st Biological replicate	CTRL	2792	3723		0.749933
2nd Biological replicate	CTRL	3182	3743		0.85012
3rd Biological replicate	CTRL	2323	3574		0.649972	0.750008	0.100074	0.133431
1st Biological replicate	H2O2	3812	2932		1.30014
2nd Biological replicate	H2O2	4060	2900		1.4
3rd Biological replicate	H2O2	3991	3001		1.32989	1.34334	0.0512728	0.0381681
1st Biological replicate	PGE2	5812	3321		1.75008
2nd Biological replicate	PGE2	5835	3473		1.6801
3rd Biological replicate	PGE2	5438	3021		1.80007	1.74342	0.060258	0.0345632
1st Biological replicate	CTRL + PXB	1199	2998		0.399933
2nd Biological replicate	CTRL + PXB	985	3283		0.30003
3rd Biological replicate	CTRL + PXB	1588	3175		0.500157	0.40004	0.100064	0.250134
1st Biological replicate	H2O2 + PXB	1438	2875		0.500174
2nd Biological replicate	H2O2 + PXB	1345	2988		0.450134
3rd Biological replicate	H2O2 + PXB	964	2754		0.350036	0.433448	0.076447	0.176369
1st Biological replicate	PGE2 + PXB	755	3021		0.249917
2nd Biological replicate	PGE2 + PXB	922	3074		0.299935
3rd Biological replicate	PGE2 + PXB	1194	2984		0.400134	0.316662	0.0764926	0.241559
