# Supplementary material for: Increase of circulating IGFBP-4 following genotoxic stress and its implication for senescence
Source: eLife. 2020 Mar 30;9:e54523. doi: 10.7554/eLife.54523 (PMC7136022; doi:10.7554/eLife.54523)
Supplement: Figure 4—figure supplement 1—source data 2. [file elife-54523-fig4-figsupp1-data2.xlsx]

## Sheet: Figure 4 - figure supplement 1
Panel a
	Sample	EP1 mRNA	GAPDH		Rate	Mean	ST Dev	CV
1st Biological replicate	CTRL	1739	1234		1.40924
2nd Biological replicate	CTRL	1523	1200		1.26917
3rd Biological replicate	CTRL	1779	1183		1.5038	1.39407	0.118052	0.0846814
		EP2 mRNA	GAPDH
1st Biological replicate	CTRL	3257	1234		2.63938
2nd Biological replicate	CTRL	2379	1200		1.9825
3rd Biological replicate	CTRL	2900	1183		2.45139	2.35776	0.338304	0.143486
		EP3 mRNA	GAPDH
1st Biological replicate	CTRL	n.d.	1234		#VALUE!
2nd Biological replicate	CTRL	n.d.	1200		#VALUE!
3rd Biological replicate	CTRL	n.d.	1183		#VALUE!	#VALUE!	#VALUE!	#VALUE!
		EP4 mRNA	GAPDH
1st Biological replicate	CTRL	401	1234		0.324959
2nd Biological replicate	CTRL	538	1200		0.448333
3rd Biological replicate	CTRL	479	1183		0.404903	0.392732	0.062581	0.159348
Panel b
	Sample	EP2 mRNA	GAPDH		Rate	Mean	ST Dev	CV
1st Biological replicate	siCTRL	539	1078		0.5
2nd Biological replicate	siCTRL	575.6	1232		0.467208
3rd Biological replicate	siCTRL	505.8	1043		0.484947	0.484052	0.0164144	0.0339105
1st Biological replicate	siEP2	11.01	1101		0.01
2nd Biological replicate	siEP2	38.28	1276		0.03
3rd Biological replicate	siEP2	76.79	1097		0.07	0.0366667	0.0305505	0.833196
Panel c
	Sample	Gas mRNA	GAPDH		Rate	Mean	ST Dev	CV
1st Biological replicate	siCTRL	2156	1078		2
2nd Biological replicate	siCTRL	1965.6	1092		1.8
3rd Biological replicate	siCTRL	1909.1	1123		1.7	1.83333	0.152753	0.0833196
1st Biological replicate	siGas	324.9	1083		0.3
2nd Biological replicate	siGas	560.5	1121		0.5
3rd Biological replicate	siGas	220.2	1101		0.2	0.333333	0.152753	0.458258
