# Supplementary material for: Increase of circulating IGFBP-4 following genotoxic stress and its implication for senescence
Source: eLife. 2020 Mar 30;9:e54523. doi: 10.7554/eLife.54523 (PMC7136022; doi:10.7554/eLife.54523)
Supplement: Figure 4—source data 2. [file elife-54523-fig4-data2.xlsx]

## Sheet: Figure 4
Panel b
	Sample	WB	LC		Rate	Mean	ST. DEV	CV
1st Biological replicate	CTRL	1812	2788		0.649928
2nd Biological replicate	CTRL	2076	2732		0.759883
3rd Biological replicate	CTRL	1611	2983		0.54006	0.649957	0.109911	0.169105
1st Biological replicate	H	3999	2341		1.70824
2nd Biological replicate	H	3675	2500		1.47
3rd Biological replicate	H	3335	2463		1.35404	1.51076	0.180586	0.119533
1st Biological replicate	siCTRL	4453	2873		1.54995
2nd Biological replicate	siCTRL	4400	2993		1.4701
3rd Biological replicate	siCTRL	4553	2743		1.65986	1.55997	0.0952783	0.0610771
1st Biological replicate	siEP	839	2798		0.299857
2nd Biological replicate	siEP	737	2458		0.299837
3rd Biological replicate	siEP	1119	2664		0.420045	0.339913	0.0693963	0.204159
1st Biological replicate	siGa	1404	2987		0.470037
2nd Biological replicate	siGa	951	2883		0.329865
3rd Biological replicate	siGa	873	2911		0.299897	0.366599	0.0908239	0.247747
Panel c
	Sample	WB	LC		Rate	Mean	ST. DEV	CV
1st Biological replicate	CT	1802	2773		0.649838
2nd Biological replicate	CT	2205	3021		0.729891
3rd Biological replicate	CT	1734	2990		0.579933	0.653221	0.075036	0.114871
1st Biological replicate	H2O2	4788	2547		1.87986
2nd Biological replicate	H2O2	4715	2443		1.93
3rd Biological replicate	H2O2	4713	2678		1.7599	1.85659	0.0874097	0.0470809
1st Biological replicate	H2O2 + BSD	1351	2456		0.550081
2nd Biological replicate	H2O2 + BSD	1692	2525		0.670099
3rd Biological replicate	H2O2 + BSD	1387	2102		0.659848	0.626676	0.0665306	0.106164
1st Biological replicate	H2O2 + LY	5361	2331		2.29987
2nd Biological replicate	H2O2 + LY	4702	2011		2.33814
3rd Biological replicate	H2O2 + LY	5120	2073		2.46985	2.36929	0.0891675	0.0376347
1st Biological replicate	H2O2 + PP1	4470	2235		2
2nd Biological replicate	H2O2 + PP1	4815	2432		1.97985
3rd Biological replicate	H2O2 + PP1	4452	2120		2.1	2.02662	0.0643448	0.0317498
1st Biological replicate	H2O2 + U0	5249	2333		2.24989
2nd Biological replicate	H2O2 + U0	4669	2032		2.29774
3rd Biological replicate	H2O2 + U0	4254	2127		2	2.18254	0.159887	0.073257
