# Supplementary material for: Increase of circulating IGFBP-4 following genotoxic stress and its implication for senescence
Source: eLife. 2020 Mar 30;9:e54523. doi: 10.7554/eLife.54523 (PMC7136022; doi:10.7554/eLife.54523)
Supplement: Figure 5—source data 2. [file elife-54523-fig5-data2.xlsx]

## Sheet: Figure 5
Panel a
	Sample	Positive cells	Total cells		Rate	Mean	ST Dev	CV		% positive cells
1st Biological replicate	CTRL	52	521		0.0998081
2nd Biological replicate	CTRL	57	478		0.119247
3rd Biological replicate	CTRL	35	442		0.0791855	0.0994135	0.0200336	0.201518		9.94135
1st Biological replicate	IGF-I	40	498		0.0803213
2nd Biological replicate	IGF-I	45	501		0.0898204
3rd Biological replicate	IGF-I	49	489		0.100204	0.0901154	0.00994489	0.110357		9.01154
1st Biological replicate	IGF-I + IGF-IR	60	499		0.12024
2nd Biological replicate	IGF-I + IGF-IR	53	532		0.0996241
3rd Biological replicate	IGF-I + IGF-IR	56	510		0.109804	0.109889	0.0103085	0.0938077		10.9889
1st Biological replicate	IGF-I + IGF-IIR	52	521		0.0998081
2nd Biological replicate	IGF-I + IGF-IIR	40	505		0.0792079
3rd Biological replicate	IGF-I + IGF-IIR	43	479		0.0897704	0.0895954	0.0103012	0.114974		8.95954
1st Biological replicate	IGF-II	96	532		0.180451
2nd Biological replicate	IGF-II	94	427		0.220141
3rd Biological replicate	IGF-II	106	530		0.2	0.200197	0.0198454	0.0991294		20.0197
1st Biological replicate	IGF-II + IGF-IR	153	479		0.319415
2nd Biological replicate	IGF-II + IGF-IR	183	537		0.340782
3rd Biological replicate	IGF-II + IGF-IR	171	550		0.310909	0.323702	0.015391	0.0475467		32.3702
1st Biological replicate	IGF-II +IGF-IIR	57	475		0.12
2nd Biological replicate	IGF-II +IGF-IIR	72	479		0.150313
3rd Biological replicate	IGF-II +IGF-IIR	52	521		0.0998081	0.123374	0.025421	0.206049		12.3374
Panel b
	Sample	Positive cells	Total cells		Rate	Mean	ST Dev	CV		% positive cells
1st Biological replicate	CTRL	40	446		0.0896861
2nd Biological replicate	CTRL	59	574		0.102787
3rd Biological replicate	CTRL	42	521		0.0806142	0.0910293	0.0111475	0.12246		9.10293
1st Biological replicate	IGF-II	100	502		0.199203
2nd Biological replicate	IGF-II	115	521		0.220729
3rd Biological replicate	IGF-II	86	478		0.179916	0.19995	0.0204168	0.10211		19.995
1st Biological replicate	IGFBP-4	84	465		0.180645
2nd Biological replicate	IGFBP-4	75	497		0.150905
3rd Biological replicate	IGFBP-4	95	499		0.190381	0.173977	0.0205651	0.118206		17.3977
1st Biological replicate	IGF-II + IGFBP-4	143	477		0.29979
2nd Biological replicate	IGF-II + IGFBP-4	157	475		0.330526
3rd Biological replicate	IGF-II + IGFBP-4	141	448		0.314732	0.315016	0.0153699	0.048791		31.5016
Panel c
	Sample	Positive cells	Total cells		Rate	Mean	ST Dev	CV		% positive cells
1st Biological replicate	G1 CTRL	2405	3798		0.633228
2nd Biological replicate	G1 CTRL	2559	3998		0.64007
3rd Biological replicate	G1 CTRL	2016	3476		0.579977	0.617758	0.032898	0.0532538		61.7758
1st Biological replicate	G1 IGF-II	2856	3984		0.716867
2nd Biological replicate	G1 IGF-II	2740	3754		0.729888
3rd Biological replicate	G1 IGF-II	2563	3789		0.676432	0.707729	0.0278752	0.0393868		70.7729
1st Biological replicate	G1 IGFBP-4	2230	3321		0.671484
2nd Biological replicate	G1 IGFBP-4	2602	4036		0.644698
3rd Biological replicate	G1 IGFBP-4	2799	3984		0.70256	0.672914	0.0289577	0.0430333		67.2914
1st Biological replicate	G1 IGF-II + IGFBP-4	2952	3975		0.742642
2nd Biological replicate	G1 IGF-II + IGFBP-4	2712	3874		0.700052
3rd Biological replicate	G1 IGF-II + IGFBP-4	2550	3347		0.761876	0.734856	0.031639	0.0430547		73.4856
1st Biological replicate	S CTRL	646	3798		0.17009
2nd Biological replicate	S CTRL	640	3998		0.16008
3rd Biological replicate	S CTRL	626	3476		0.180092	0.170087	0.010006	0.0588287		17.0087
1st Biological replicate	S IGF-II	239	3984		0.05999
2nd Biological replicate	S IGF-II	200	3754		0.0532765
3rd Biological replicate	S IGF-II	169	3789		0.0446028	0.0526231	0.00771436	0.146597		5.26231
1st Biological replicate	S IGFBP-4	186	3321		0.0560072
2nd Biological replicate	S IGFBP-4	179	4036		0.0443508
3rd Biological replicate	S IGFBP-4	262	3984		0.0657631	0.0553737	0.0107202	0.193596		5.53737
1st Biological replicate	S IGF-II + IGFBP-4	129	3975		0.0324528
2nd Biological replicate	S IGF-II + IGFBP-4	116	3874		0.0299432
3rd Biological replicate	S IGF-II + IGFBP-4	134	3347		0.0400359	0.034144	0.00525455	0.153894		3.4144
1st Biological replicate	G2/M CTRL	798	3798		0.210111
2nd Biological replicate	G2/M CTRL	767	3998		0.191846
3rd Biological replicate	G2/M CTRL	819	3476		0.235616	0.212524	0.0219844	0.103445		21.2524
1st Biological replicate	G2/M IGF-II	1096	3984		0.2751
2nd Biological replicate	G2/M IGF-II	798	3754		0.212573
3rd Biological replicate	G2/M IGF-II	990	3789		0.261283	0.249652	0.0328461	0.131567		24.9652
1st Biological replicate	G2/M IGFBP-4	664	3321		0.19994
2nd Biological replicate	G2/M IGFBP-4	928	4036		0.229931
3rd Biological replicate	G2/M IGFBP-4	702	3984		0.176205	0.202025	0.0269235	0.133268		20.2025
1st Biological replicate	G2/M IGF-II + IGFBP-4	922	3975		0.23195
2nd Biological replicate	G2/M IGF-II + IGFBP-4	824	3874		0.2127
3rd Biological replicate	G2/M IGF-II + IGFBP-4	839	3347		0.250672	0.231774	0.0189867	0.0819191		23.1774
Panel e
	Sample	WB IGFBP4	LC		Rate	Mean	ST Dev	CV
1st Biological replicate	RB CTRL	5302	2773		1.91201
2nd Biological replicate	RB CTRL	5196	2543		2.04326
3rd Biological replicate	RB CTRL	3801	2432		1.56291	1.83939	0.248269	0.134974
1st Biological replicate	RB IGF-II	3707	2232		1.66084
2nd Biological replicate	RB IGF-II	3996	2121		1.88402
3rd Biological replicate	RB IGF-II	3406	2344		1.45307	1.66598	0.215519	0.129365
1st Biological replicate	RB IFGBP-4	2868	2987		0.960161
2nd Biological replicate	RB IFGBP-4	3147	2773		1.13487
3rd Biological replicate	RB IFGBP-4	2039	2574		0.792152	0.962395	0.171371	0.178067
1st Biological replicate	RB IGF-II + IGFBP-4	1286	2474		0.519806
2nd Biological replicate	RB IGF-II + IGFBP-4	1553	2589		0.599846
3rd Biological replicate	RB IGF-II + IGFBP-4	1202	2743		0.438206	0.519286	0.0808208	0.155638
1st Biological replicate	RB2 CTRL	2763	2783		0.992814
2nd Biological replicate	RB2 CTRL	2954	2543		1.16162
3rd Biological replicate	RB2 CTRL	1902	2232		0.852151	1.00219	0.154948	0.154609
1st Biological replicate	RB2 IGF-II	4189	2022		2.07171
2nd Biological replicate	RB2 IGF-II	6312	2456		2.57003
3rd Biological replicate	RB2 IGF-II	5598	2789		2.00717	2.2163	0.308032	0.138985
1st Biological replicate	RB2 IFGBP-4	6614	2343		2.82288
2nd Biological replicate	RB2 IFGBP-4	4656	2011		2.31527
3rd Biological replicate	RB2 IFGBP-4	7573	2375		3.18863	2.77559	0.438599	0.15802
1st Biological replicate	RB2 IGF-II + IGFBP-4	5321	2773		1.91886
2nd Biological replicate	RB2 IGF-II + IGFBP-4	4670	2563		1.82208
3rd Biological replicate	RB2 IGF-II + IGFBP-4	5216	2486		2.09815	1.94636	0.140073	0.0719666
1st Biological replicate	P107 CTRL	6494	2701		2.40429
2nd Biological replicate	P107 CTRL	4913	2432		2.02015
3rd Biological replicate	P107 CTRL	7030	2643		2.65986	2.36143	0.322001	0.136358
1st Biological replicate	P107 IGF-II	505	2021		0.249876
2nd Biological replicate	P107 IGF-II	454	2017		0.225087
3rd Biological replicate	P107 IGF-II	569	2143		0.265516	0.246826	0.0203863	0.0825937
1st Biological replicate	P107 IFGBP-4	541	2574		0.210179
2nd Biological replicate	P107 IFGBP-4	385	2408		0.159884
3rd Biological replicate	P107 IFGBP-4	661	2543		0.259929	0.209997	0.050023	0.238208
1st Biological replicate	P107 IGF-II + IGFBP-4	1736	2198		0.789809
2nd Biological replicate	P107 IGF-II + IGFBP-4	1839	2043		0.900147
3rd Biological replicate	P107 IGF-II + IGFBP-4	1599	2317		0.690117	0.793357	0.10506	0.132425
1st Biological replicate	P53 CTRL	1352	2773		0.487559
2nd Biological replicate	P53 CTRL	1668	2653		0.628722
3rd Biological replicate	P53 CTRL	1164	2571		0.452742	0.523008	0.0931919	0.178185
1st Biological replicate	P53 IGF-II	2117	2109		1.00379
2nd Biological replicate	P53 IGF-II	2378	2222		1.07021
3rd Biological replicate	P53 IGF-II	2015	2343		0.860009	0.978003	0.107446	0.109863
1st Biological replicate	P53 IFGBP-4	1951	2501		0.780088
2nd Biological replicate	P53 IFGBP-4	1749	2498		0.70016
3rd Biological replicate	P53 IFGBP-4	1979	2301		0.860061	0.780103	0.0799504	0.102487
1st Biological replicate	P53 IGF-II + IGFBP-4	2957	2484		1.19042
2nd Biological replicate	P53 IGF-II + IGFBP-4	2388	2157		1.10709
3rd Biological replicate	P53 IGF-II + IGFBP-4	2129	2089		1.01915	1.10555	0.0856458	0.0774687
1st Biological replicate	P27 CTRL	1753	2783		0.629896
2nd Biological replicate	P27 CTRL	1704	2543		0.670075
3rd Biological replicate	P27 CTRL	1317	2232		0.590054	0.630008	0.0400106	0.0635081
1st Biological replicate	P27 IGF-II	1718	2022		0.849654
2nd Biological replicate	P27 IGF-II	2058	2456		0.837948
3rd Biological replicate	P27 IGF-II	2309	2789		0.827895	0.838499	0.0108897	0.0129872
1st Biological replicate	P27 IFGBP-4	3018	2343		1.28809
2nd Biological replicate	P27 IFGBP-4	2051	2011		1.01989
3rd Biological replicate	P27 IFGBP-4	3199	2375		1.34695	1.21831	0.174338	0.143098
1st Biological replicate	P27 IGF-II + IGFBP-4	3383	2773		1.21998
2nd Biological replicate	P27 IGF-II + IGFBP-4	3466	2563		1.35232
3rd Biological replicate	P27 IGF-II + IGFBP-4	2622	2486		1.05471	1.209	0.149111	0.123334
1st Biological replicate	P21 CTRL	4354	2773		1.57014
2nd Biological replicate	P21 CTRL	4782	2653		1.80249
3rd Biological replicate	P21 CTRL	3435	2571		1.33606	1.56956	0.233216	0.148587
1st Biological replicate	P21 IGF-II	3167	2109		1.50166
2nd Biological replicate	P21 IGF-II	4039	2222		1.81773
3rd Biological replicate	P21 IGF-II	3632	2343		1.55015	1.62318	0.170222	0.104869
1st Biological replicate	P21 IFGBP-4	3206	2501		1.28189
2nd Biological replicate	P21 IFGBP-4	3897	2498		1.56005
3rd Biological replicate	P21 IFGBP-4	3328	2301		1.44633	1.42942	0.139849	0.0978361
1st Biological replicate	P21 IGF-II + IGFBP-4	3801	2484		1.53019
2nd Biological replicate	P21 IGF-II + IGFBP-4	3430	2157		1.59017
3rd Biological replicate	P21 IGF-II + IGFBP-4	2831	2089		1.35519	1.49185	0.122091	0.0818382
1st Biological replicate	P16 CTRL	2912	2773		1.05013
2nd Biological replicate	P16 CTRL	2924	2543		1.14982
3rd Biological replicate	P16 CTRL	2310	2432		0.949836	1.04993	0.0999939	0.0952388
1st Biological replicate	P16 IGF-II	4892	2232		2.19176
2nd Biological replicate	P16 IGF-II	4709	2121		2.22018
3rd Biological replicate	P16 IGF-II	4588	2344		1.95734	2.12309	0.144248	0.0679426
1st Biological replicate	P16 IFGBP-4	6422	2987		2.14998
2nd Biological replicate	P16 IFGBP-4	6378	2773		2.30004
3rd Biological replicate	P16 IFGBP-4	5148	2574		2	2.15001	0.150018	0.0697756
1st Biological replicate	P16 IGF-II + IGFBP-4	6582	2474		2.66047
2nd Biological replicate	P16 IGF-II + IGFBP-4	7663	2589		2.95983
3rd Biological replicate	P16 IGF-II + IGFBP-4	6136	2743		2.23697	2.61909	0.363204	0.138676
Panel g
	Sample	Intesity ROI	n° of cells		Rate	Mean	ST Dev	CV
1st Biological replicate	CTRL	8258	478		17.2762
2nd Biological replicate	CTRL	9513	501		18.988
3rd Biological replicate	CTRL	7473	497		15.0362	17.1001	1.98177	0.115892
1st Biological replicate	IGF-II	2235	447		5
2nd Biological replicate	IGF-II	2129.4	507		4.2
3rd Biological replicate	IGF-II	2370.5	431		5.5	4.9	0.655744	0.133825
1st Biological replicate	IFGBP-4	1047.5	419		2.5
2nd Biological replicate	IFGBP-4	1093.4	497		2.2
3rd Biological replicate	IFGBP-4	920.08	434		2.12	2.27333	0.200333	0.088123
1st Biological replicate	IGF-II + IGFBP-4	1014.54	457		2.22
2nd Biological replicate	IGF-II + IGFBP-4	1127.76	444		2.54
3rd Biological replicate	IGF-II + IGFBP-4	1152	476		2.42017	2.39339	0.161672	0.0675494
Panel h
	Sample	positive cells	n° of cells		Rate	Mean	ST Dev	CV		%
1st Biological replicate	CTRL	272	478		0.569038
2nd Biological replicate	CTRL	316	501		0.630739
3rd Biological replicate	CTRL	249	497		0.501006	0.566927	0.064892	0.114463		56.6927
1st Biological replicate	IGF-II	179	447		0.400447
2nd Biological replicate	IGF-II	177	507		0.349112
3rd Biological replicate	IGF-II	185	431		0.429234	0.392931	0.0405863	0.103291		39.2931
1st Biological replicate	IFGBP-4	189	419		0.451074
2nd Biological replicate	IFGBP-4	199	497		0.400402
3rd Biological replicate	IFGBP-4	161	434		0.370968	0.407481	0.0405196	0.0994391		40.7481
1st Biological replicate	IGF-II + IGFBP-4	101	457		0.221007
2nd Biological replicate	IGF-II + IGFBP-4	149	444		0.335586
3rd Biological replicate	IGF-II + IGFBP-4	129	476		0.271008	0.275867	0.0574438	0.20823		27.5867
Panel j
	Sample	Intesity ROI	n° of cells		Rate	Mean	ST Dev	CV
1st Biological replicate	CTRL	1665	473		3.52008
2nd Biological replicate	CTRL	1454.5	519		2.8025
3rd Biological replicate	CTRL	1354.5	501		2.70359	3.00873	0.445601	0.148103
1st Biological replicate	IGF-II	3824	478		8
2nd Biological replicate	IGF-II	4254.3	489		8.7
3rd Biological replicate	IGF-II	4428	492		9	8.56667	0.51316	0.059902
1st Biological replicate	IFGBP-4	4473	497		9
2nd Biological replicate	IFGBP-4	4259.6	463		9.2
3rd Biological replicate	IFGBP-4	4106.4	472		8.7	8.96667	0.251661	0.0280663
1st Biological replicate	IGF-II + IGFBP-4	3196.8	444		7.2
2nd Biological replicate	IGF-II + IGFBP-4	3465	495		7
3rd Biological replicate	IGF-II + IGFBP-4	3011.8	407		7.4	7.2	0.2	0.0277778
Panel k
	Sample	Intesity ROI	n° of cells		Rate	Mean	ST Dev	CV
1st Biological replicate	CTRL	1928.5	473		4.07717
2nd Biological replicate	CTRL	1939.3	519		3.73661
3rd Biological replicate	CTRL	1804	501		3.6008	3.80486	0.245408	0.0644987
1st Biological replicate	IGF-II	1816.4	478		3.8
2nd Biological replicate	IGF-II	1956	489		4
3rd Biological replicate	IGF-II	1515.6	492		3.08049	3.62683	0.483598	0.133339
1st Biological replicate	IFGBP-4	1688	497		3.39638
2nd Biological replicate	IFGBP-4	1898.3	463		4.1
3rd Biological replicate	IFGBP-4	1540.8	472		3.26441	3.58693	0.449206	0.125234
1st Biological replicate	IGF-II + IGFBP-4	1909.2	444		4.3
2nd Biological replicate	IGF-II + IGFBP-4	2178	495		4.4
3rd Biological replicate	IGF-II + IGFBP-4	1628	407		4	4.23333	0.208167	0.0491732
Panel m
	Sample	n° of foci	n° of cells		Rate	Mean	ST Dev	CV
1st Biological replicate	CTRL	154.3	498		0.309839
2nd Biological replicate	CTRL	157.36	501		0.314092
3rd Biological replicate	CTRL	136.49	477		0.286143	0.303358	0.0150598	0.0496436
1st Biological replicate	IGF-II	191.14	503		0.38
2nd Biological replicate	IGF-II	194.22	498		0.39
3rd Biological replicate	IGF-II	204.8	512		0.4	0.39	0.01	0.025641
1st Biological replicate	IFGBP-4	175.33	501		0.34996
2nd Biological replicate	IFGBP-4	162.86	479		0.34
3rd Biological replicate	IFGBP-4	175.7	502		0.35	0.346653	0.00576201	0.0166218
1st Biological replicate	IGF-II + IGFBP-4	160	500		0.32
2nd Biological replicate	IGF-II + IGFBP-4	160.93	489		0.3291
3rd Biological replicate	IGF-II + IGFBP-4	179.62	499		0.35996	0.336353	0.0209441	0.0622681
Panel n
	Sample	positive cellsi	n° of cells		Rate	Mean	ST Dev	CV		% positive cells
1st Biological replicate	CTRL	39	389		0.100257
2nd Biological replicate	CTRL	39	432		0.0902778
3rd Biological replicate	CTRL	49	443		0.110609	0.100381	0.0101664	0.101278		10.0381
1st Biological replicate	IGF-II	36	398		0.0904523
2nd Biological replicate	IGF-II	47	401		0.117207
3rd Biological replicate	IGF-II	45	374		0.120321	0.109327	0.0164197	0.15019		10.9327
1st Biological replicate	IFGBP-4	49	443		0.110609
2nd Biological replicate	IFGBP-4	43	387		0.111111
3rd Biological replicate	IFGBP-4	50	401		0.124688	0.11547	0.00798753	0.0691743		11.547
1st Biological replicate	IGF-II + IGFBP-4	52	432		0.12037
2nd Biological replicate	IGF-II + IGFBP-4	40	404		0.0990099
3rd Biological replicate	IGF-II + IGFBP-4	35	376		0.0930851	0.104155	0.0143519	0.137793		10.4155
