# Supplementary material for: Increase of circulating IGFBP-4 following genotoxic stress and its implication for senescence
Source: eLife. 2020 Mar 30;9:e54523. doi: 10.7554/eLife.54523 (PMC7136022; doi:10.7554/eLife.54523)
Supplement: Figure 6—source data 1. [file elife-54523-fig6-data1.xlsx]

## Sheet: Figure 6
Panel a
	Sample	O.D.		Mean	ST. DEV	CV
1st Biological replicate	0 IGF-II	1950
2nd Biological replicate	0 IGF-II	2000
3rd Biological replicate	0 IGF-II	1900		1950	50	0.025641
1st Biological replicate	0 IGFBP-4	2010
2nd Biological replicate	0 IGFBP-4	1950
3rd Biological replicate	0 IGFBP-4	1890		1950	60	0.0307692
1st Biological replicate	10 IGF-II	1800
2nd Biological replicate	10 IGF-II	1750
3rd Biological replicate	10 IGF-II	1830		1793.33	40.4145	0.022536
1st Biological replicate	10 IGFBP-4	1920
2nd Biological replicate	10 IGFBP-4	1900
3rd Biological replicate	10 IGFBP-4	1870		1896.67	25.1661	0.0132686
1st Biological replicate	20 IGF-II	1570
2nd Biological replicate	20 IGF-II	1500
3rd Biological replicate	20 IGF-II	1600		1556.67	51.316	0.0329653
1st Biological replicate	20 IGFBP-4	1800
2nd Biological replicate	20 IGFBP-4	1870
3rd Biological replicate	20 IGFBP-4	1900		1856.67	51.316	0.0276388
1st Biological replicate	30 IGF-II	1250
2nd Biological replicate	30 IGF-II	1200
3rd Biological replicate	30 IGF-II	1350		1266.67	76.3763	0.060297
1st Biological replicate	30 IGFBP-4	1830
2nd Biological replicate	30 IGFBP-4	1900
3rd Biological replicate	30 IGFBP-4	1750		1826.67	75.0555	0.0410888
1st Biological replicate	60 IGF-II	1090
2nd Biological replicate	60 IGF-II	1000
3rd Biological replicate	60 IGF-II	1100		1063.33	55.0757	0.0517953
1st Biological replicate	60 IGFBP-4	1800
2nd Biological replicate	60 IGFBP-4	1700
3rd Biological replicate	60 IGFBP-4	1760		1753.33	50.3322	0.0287066
1st Biological replicate	90 IGF-II	1090
2nd Biological replicate	90 IGF-II	1100
3rd Biological replicate	90 IGF-II	1030		1073.33	37.8594	0.0352727
1st Biological replicate	90 IGFBP-4	1700
2nd Biological replicate	90 IGFBP-4	1750
3rd Biological replicate	90 IGFBP-4	1780		1743.33	40.4145	0.0231823
1st Biological replicate	120 IGF-II	950
2nd Biological replicate	120 IGF-II	900
3rd Biological replicate	120 IGF-II	1000		950	50	0.0526316
1st Biological replicate	120 IGFBP-4	1650
2nd Biological replicate	120 IGFBP-4	1700
3rd Biological replicate	120 IGFBP-4	1500		1616.67	104.083	0.0643814
1st Biological replicate	240 IGF-II	880
2nd Biological replicate	240 IGF-II	800
3rd Biological replicate	240 IGF-II	900		860	52.915	0.0615291
1st Biological replicate	240 IGFBP-4	1700
2nd Biological replicate	240 IGFBP-4	1680
3rd Biological replicate	240 IGFBP-4	1650		1676.67	25.1661	0.0150096
1st Biological replicate	480 IGF-II	430
2nd Biological replicate	480 IGF-II	400
3rd Biological replicate	480 IGF-II	500		443.333	51.316	0.11575
1st Biological replicate	480 IGFBP-4	1350
2nd Biological replicate	480 IGFBP-4	1200
3rd Biological replicate	480 IGFBP-4	1500		1350	150	0.111111
1st Biological replicate	1080 IGF-II	30
2nd Biological replicate	1080 IGF-II	100
3rd Biological replicate	1080 IGF-II	50		60	36.0555	0.600925
1st Biological replicate	1080 IGFBP-4	1300
2nd Biological replicate	1080 IGFBP-4	1100
3rd Biological replicate	1080 IGFBP-4	1350		1250	132.288	0.10583
Panel b
	Sample	Positive cells	Total cells		Rate	Mean	ST Dev	CV		% positive cells
1st Biological replicate	CTRL	38	478		0.0794979
2nd Biological replicate	CTRL	50	503		0.0994036
3rd Biological replicate	CTRL	40	497		0.0804829	0.0864615	0.011219	0.129757		8.64615
1st Biological replicate	IGF-II	65	502		0.129482
2nd Biological replicate	IGF-II	72	478		0.150628
3rd Biological replicate	IGF-II	70	498		0.140562	0.140224	0.0105768	0.0754281		14.0224
1st Biological replicate	IGFBP-4	89	523		0.170172
2nd Biological replicate	IGFBP-4	81	507		0.159763
3rd Biological replicate	IGFBP-4	78	490		0.159184	0.16304	0.00618363	0.0379271		16.304
1st Biological replicate	IGF-II + IGFBP-4	149	498		0.299197
2nd Biological replicate	IGF-II + IGFBP-4	110	501		0.219561
3rd Biological replicate	IGF-II + IGFBP-4	126	502		0.250996	0.256585	0.040111	0.156327		25.6585
1st Biological replicate	PAPP-A	56	470		0.119149
2nd Biological replicate	PAPP-A	48	478		0.100418
3rd Biological replicate	PAPP-A	54	536		0.100746	0.106771	0.0107207	0.100408		10.6771
1st Biological replicate	IGF-II + PAPP-A	66	505		0.130693
2nd Biological replicate	IGF-II + PAPP-A	71	476		0.14916
3rd Biological replicate	IGF-II + PAPP-A	49	491		0.0997963	0.12655	0.0249411	0.197086		12.655
1st Biological replicate	IGFBP-4 + PAPP-A	50	501		0.0998004
2nd Biological replicate	IGFBP-4 + PAPP-A	67	512		0.130859
3rd Biological replicate	IGFBP-4 + PAPP-A	39	493		0.0791075	0.103256	0.0260484	0.252271		10.3256
1st Biological replicate	IGF-II + IGFBP-4+ PAPP-A	73	487		0.149897
2nd Biological replicate	IGF-II + IGFBP-4+ PAPP-A	68	521		0.130518
3rd Biological replicate	IGF-II + IGFBP-4+ PAPP-A	66	507		0.130178	0.136864	0.0112882	0.0824771		13.6864
