# Supplementary material for: Increase of circulating IGFBP-4 following genotoxic stress and its implication for senescence
Source: eLife. 2020 Mar 30;9:e54523. doi: 10.7554/eLife.54523 (PMC7136022; doi:10.7554/eLife.54523)
Supplement: Figure 7—figure supplement 1—source data 2. [file elife-54523-fig7-figsupp1-data2.xlsx]

## Sheet: Figure 7 - figure supplement 1
Panel a
	Sample	O.D.		Mean	ST. DEV	CV
1st Biological replicate	0 IGF-II	2000
2nd Biological replicate	0 IGF-II	2200
3rd Biological replicate	0 IGF-II	1800		2000	200	0.1
1st Biological replicate	0 IGFBP-4	500
2nd Biological replicate	0 IGFBP-4	700
3rd Biological replicate	0 IGFBP-4	550		583.333	104.083	0.178429
Panel b
	Sample	PLCb mRNA	GAPDH		Rate	Mean	ST Dev	CV
1st Biological replicate	CTRL	743.25	991		0.75
2nd Biological replicate	CTRL	845.42	1031		0.82
3rd Biological replicate	CTRL	891.9	991		0.9	0.823333	0.0750555	0.0911606
1st Biological replicate	YM	250.25	1001		0.25
2nd Biological replicate	YM	266.45	1043		0.255465
3rd Biological replicate	YM	299.1	997		0.3	0.268488	0.0274264	0.102151
