# Supplementary material for: Increase of circulating IGFBP-4 following genotoxic stress and its implication for senescence
Source: eLife. 2020 Mar 30;9:e54523. doi: 10.7554/eLife.54523 (PMC7136022; doi:10.7554/eLife.54523)
Supplement: Figure 7—source data 2. [file elife-54523-fig7-data2.xlsx]

## Sheet: Figure 7
Panel b
	Sample	Positive cells	Total cells		Rate	Mean	ST Dev	CV		% positive cells
1st Biological replicate	CTRL	47	478		0.0983264
2nd Biological replicate	CTRL	51	507		0.100592
3rd Biological replicate	CTRL	45	503		0.0894632	0.0961271	0.00588119	0.0611814		9.61271
1st Biological replicate	IGF-II	112	511		0.219178
2nd Biological replicate	IGF-II	143	497		0.287726
3rd Biological replicate	IGF-II	120	523		0.229446	0.24545	0.0369706	0.150624		24.545
1st Biological replicate	IGF-II + PTX	108	542		0.199262
2nd Biological replicate	IGF-II + PTX	95	502		0.189243
3rd Biological replicate	IGF-II + PTX	112	478		0.23431	0.207605	0.0236633	0.113982		20.7605
1st Biological replicate	IGF-II + STP	110	501		0.219561
2nd Biological replicate	IGF-II + STP	114	523		0.217973
3rd Biological replicate	IGF-II + STP	100	499		0.200401	0.212645	0.0106334	0.0500056		21.2645
1st Biological replicate	IGF-II + YM	59	495		0.119192
2nd Biological replicate	IGF-II + YM	50	501		0.0998004
3rd Biological replicate	IGF-II + YM	50	500		0.1	0.106331	0.0111385	0.104754		10.6331
1st Biological replicate	IGF-II + D609	59	493		0.119675
2nd Biological replicate	IGF-II + D609	54	488		0.110656
3rd Biological replicate	IGF-II + D609	52	517		0.10058	0.110304	0.00955246	0.0866013		11.0304
1st Biological replicate	IGF-II + PKCi	50	503		0.0994036
2nd Biological replicate	IGF-II + PKCi	53	479		0.110647
3rd Biological replicate	IGF-II + PKCi	54	491		0.10998	0.106677	0.00630763	0.0591284		10.6677
1st Biological replicate	IGF-II + BAPTA-AM	79	493		0.160243
2nd Biological replicate	IGF-II + BAPTA-AM	81	424		0.191038
3rd Biological replicate	IGF-II + BAPTA-AM	85	501		0.169661	0.173647	0.0157795	0.0908709		17.3647
1st Biological replicate	IGF-II + U0	47	471		0.0997877
2nd Biological replicate	IGF-II + U0	58	485		0.119588
3rd Biological replicate	IGF-II + U0	49	494		0.0991903	0.106189	0.0116078	0.109313		10.6189
1st Biological replicate	IGF-II + CPZ	66	507		0.130178
2nd Biological replicate	IGF-II + CPZ	79	527		0.149905
3rd Biological replicate	IGF-II + CPZ	80	503		0.159046	0.146376	0.0147541	0.100796		14.6376
